# Supplementary material
Source: PubMed Central journal article supplement (PMC3018849)

Figure S1. Someya et al.

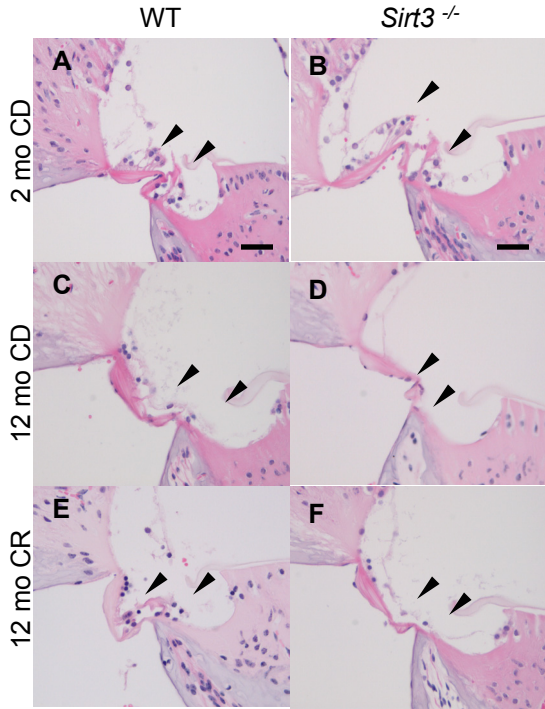

Figure S2. Someya et al.

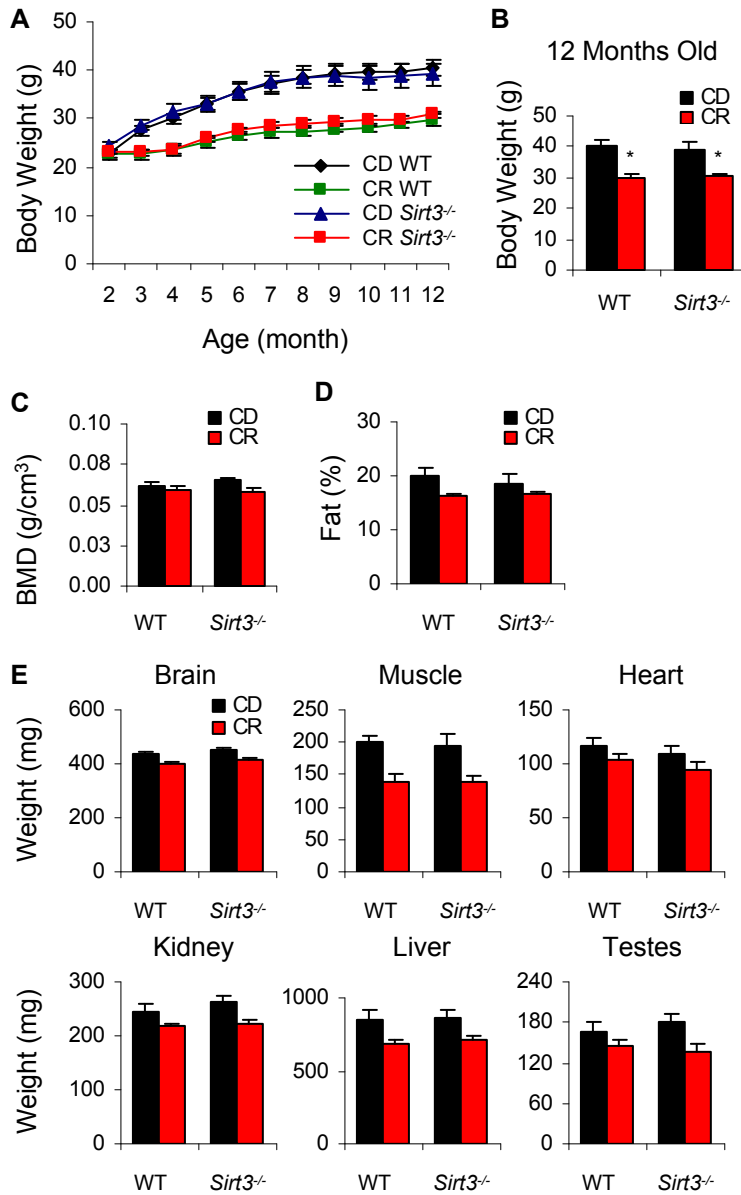

Figure S3. Someya et al.

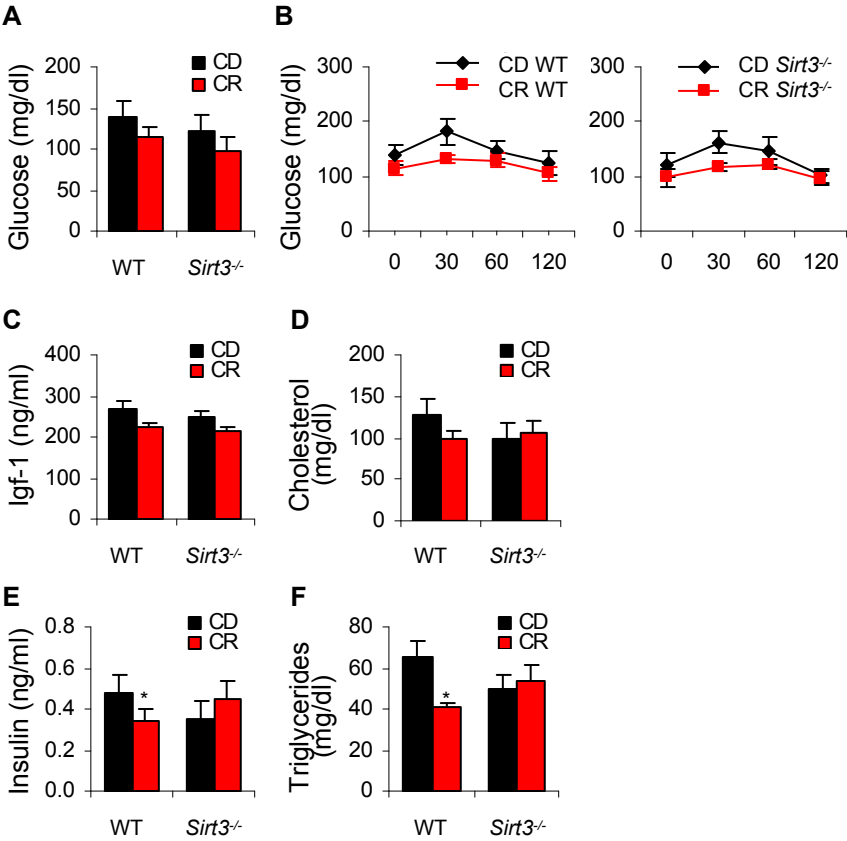

Figure S4. Someya et al.

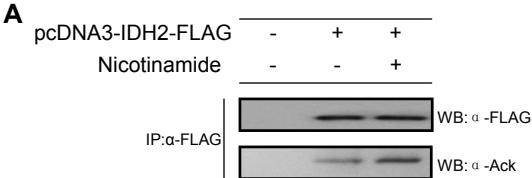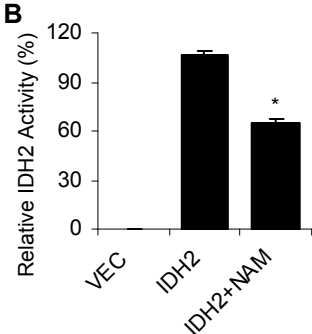

Supplement: NIHMS244038-supplement-02.pdf [file NIHMS244038-supplement-02.pdf]
